# Supplementary material
Source: PubMed Central journal article supplement (PMC2741269)
Supplement: 0903302106_0903302106SI.pdf [file 0903302106_0903302106SI.pdf]

# Supporting Information

Nakamura et al. 10.1073/pnas.0903302106

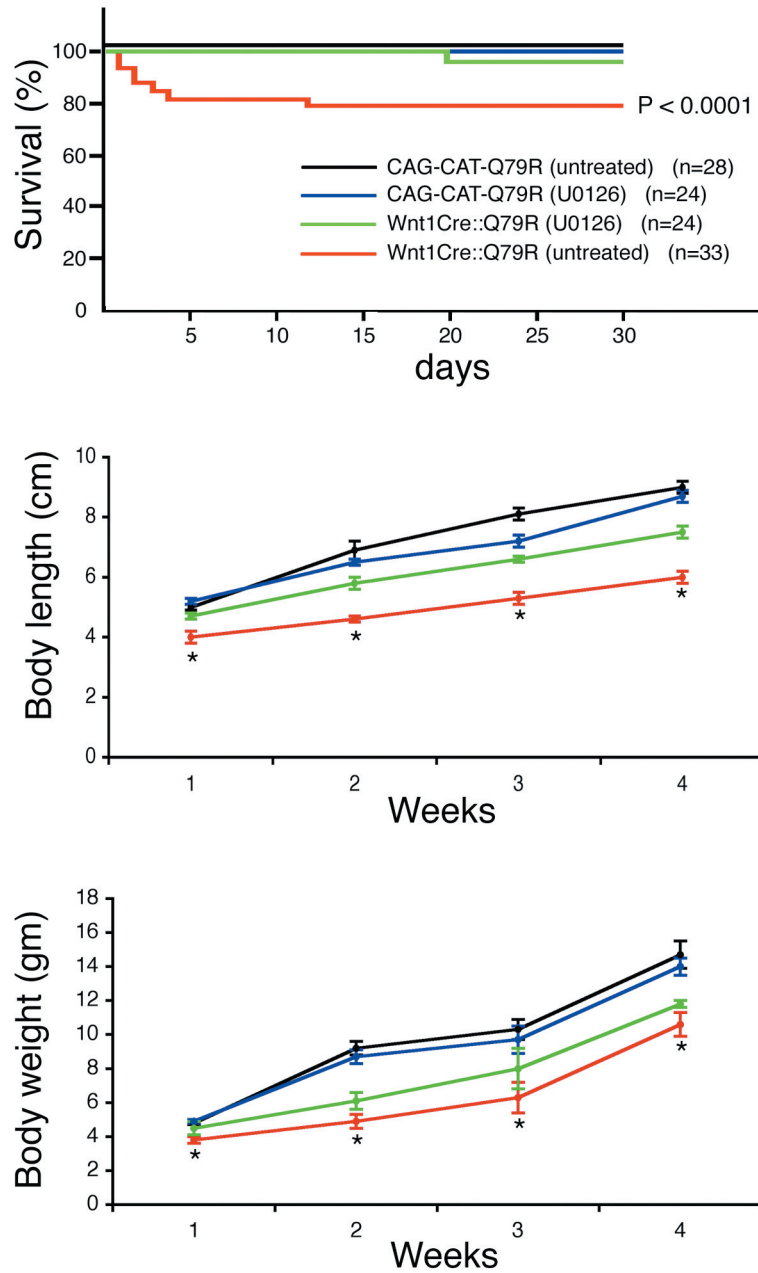

**Fig. S1.** Selective activation of ERK1/2 in Q79R-expressing frontal bones. A survey of potential pathways that could be activated by SHP2 Q79R was made. Activation of apoptosis was also analyzed by titrating for cleaved caspase 3. Only ERK1/2 was activated, as measured by increased phosphorylation.

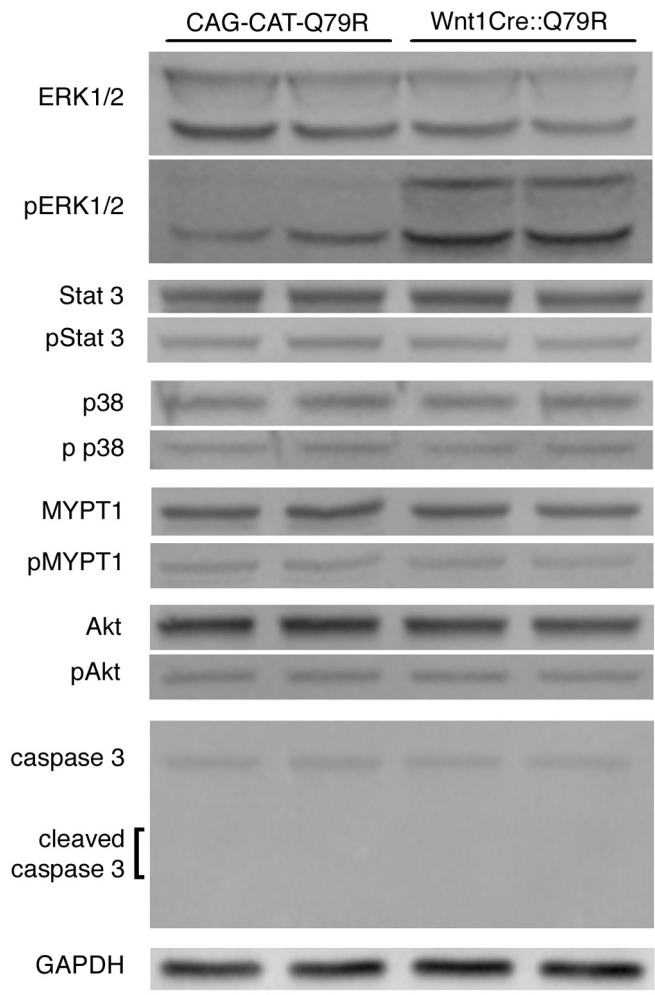

**Fig. 52.** Morbidity and mortality in Wnt1Cre::Q79R mice. Shown are survival, body length, and weight of the Wnt1Cre::Q79R mice compared with the CAG-CAT-Q79R control animals. U0126-treated cohorts are also shown, and abrogation of ERK1/2 hyperphosphorylation significantly decreased phenotypic presentation of growth defects and decreased mortality. Measurement of the body length and weight was performed on the third day of each week. \*,  $P < 0.05$ , Wnt1Cre::Q79R vs. CAG-CAT-Q79R mice.

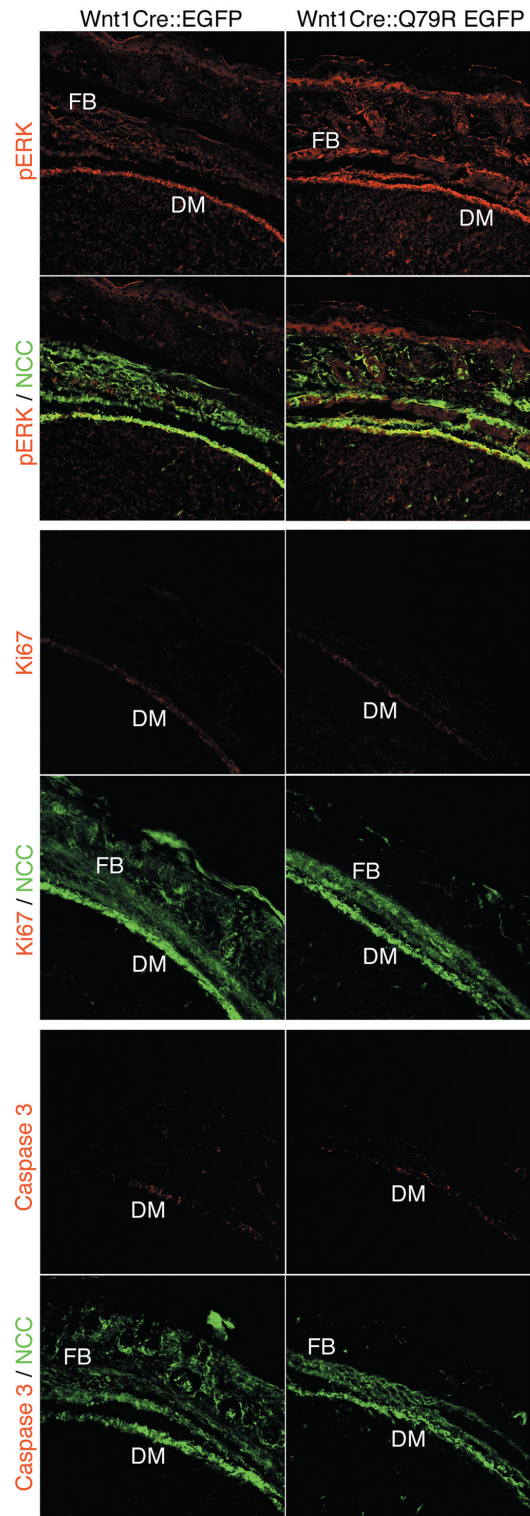

**Fig. S3.** Immunostaining of the frontal bone (FB) and DM in E15.5 embryos. Shown are sections that include the FB and DM: all sections were derived from E15.5 embryos, treated identically, and analyzed by immunohistochemistry using the indicated antibodies. Despite the hyperphosphorylation in the FB and DM of the Wnt1Cre::Q79R EGFP mice, cell proliferation as measured by Ki67 staining and activation of apoptosis (staining for activated caspase 3) are unchanged as compared with control Wnt1Cre::EGFP mice.

**Table S1. ERK1/2 inhibition restores normal bone growth parameters**

| Parameter                   | Untreated               |                           | U0126                    |                           |
|-----------------------------|-------------------------|---------------------------|--------------------------|---------------------------|
|                             | CAG-CAT-Q79R<br>(n = 9) | Wnt1Cre::Q79R<br>(n = 13) | CAG-CAT-Q79R<br>(n = 12) | Wnt1Cre::Q79R<br>(n = 12) |
| Length (mm)                 | 22.36 ± 0.21            | 18.52 ± 0.19              | 22.33 ± 0.26             | 20.10 ± 0.22*             |
| Width (mm)                  | 10.87 ± 0.14            | 11.45 ± 0.29              | 10.76 ± 0.07             | 10.81 ± 0.06              |
| Inner canthal distance (mm) | 4.41 ± 0.13             | 6.26 ± 0.29               | 4.17 ± 0.08              | 4.37 ± 0.10*              |
| Nasal bone width (mm)       | 2.62 ± 0.17             | 2.87 ± 0.08               | 2.54 ± 0.03              | 2.61 ± 0.05               |
| Mandibular bone length (mm) | 12.81 ± 0.21            | 11.15 ± 0.29              | 12.73 ± 0.21             | 12.30 ± 0.15*             |
| Mandibular bone width (mm)  | 8.76 ± 0.16             | 9.05 ± 0.20               | 8.88 ± 0.06              | 8.96 ± 0.06               |
| Frontal bone height (mm)    | 3.38 ± 0.17             | 5.52 ± 0.31               | 3.18 ± 0.05              | 3.38 ± 0.07*              |

\**P* < 0.05 vs. untreated Wnt1Cre::Q79R measurements.
